# Supplementary figures and images for: n-6 High Fat Diet Induces Gut Microbiome Dysbiosis and Colonic Inflammation
Source: MDPI journal article supplement (doi:10.3390/ijms22136919), 2021-06-28

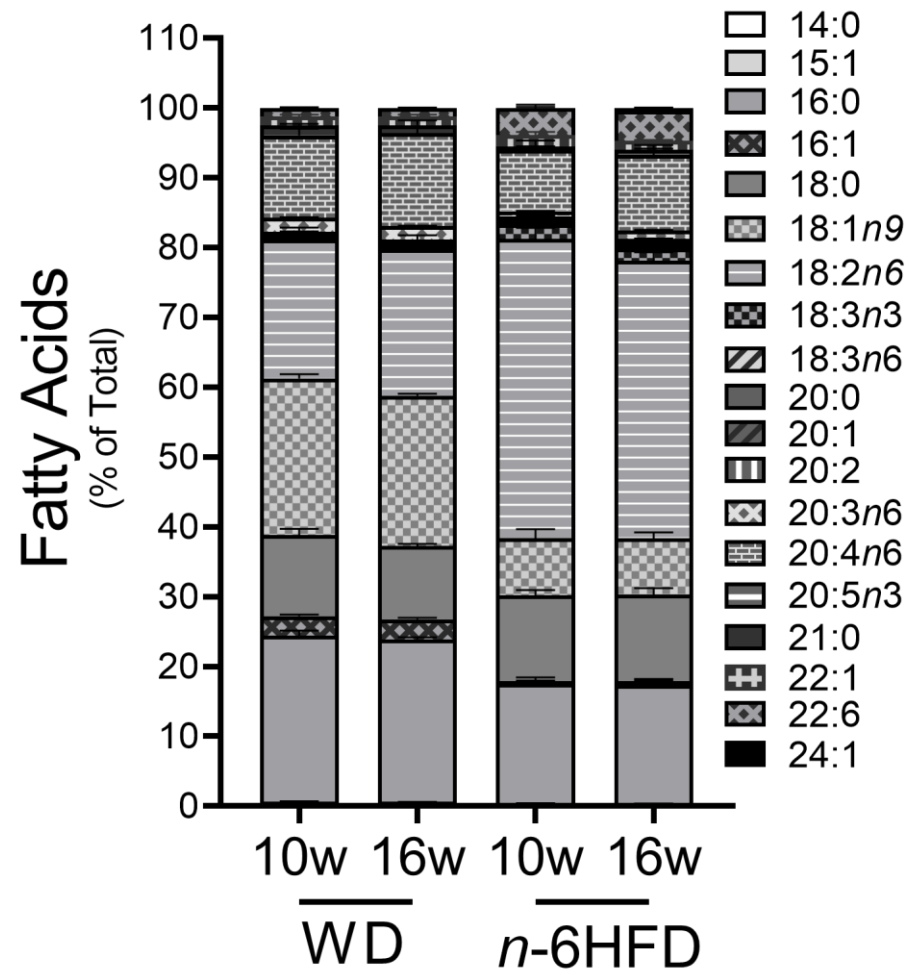

Supplement: s1 [file s1]
